# Supplementary material
Source: PubMed Central journal article supplement (PMC56939)

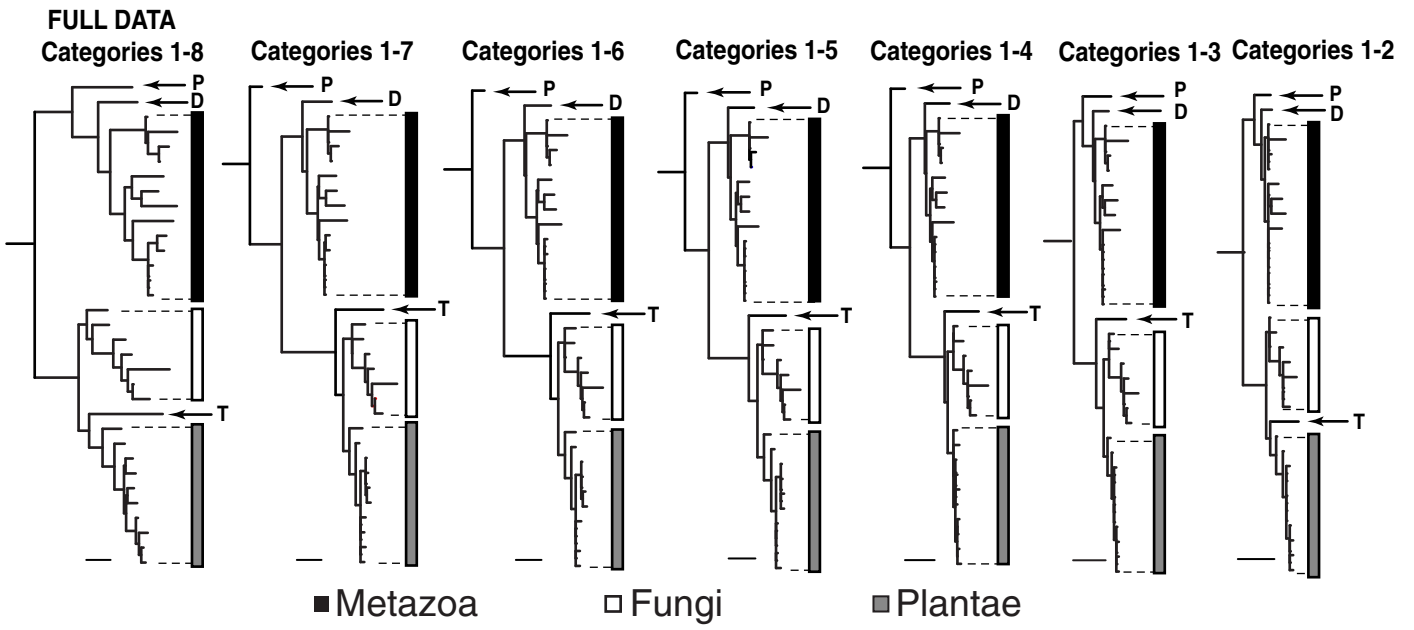

Supplement: pnas_181187698_4.pdf [file pnas_181187698_4.pdf]

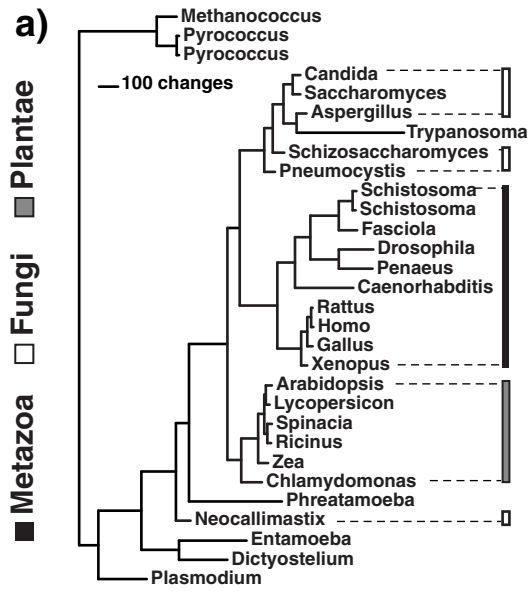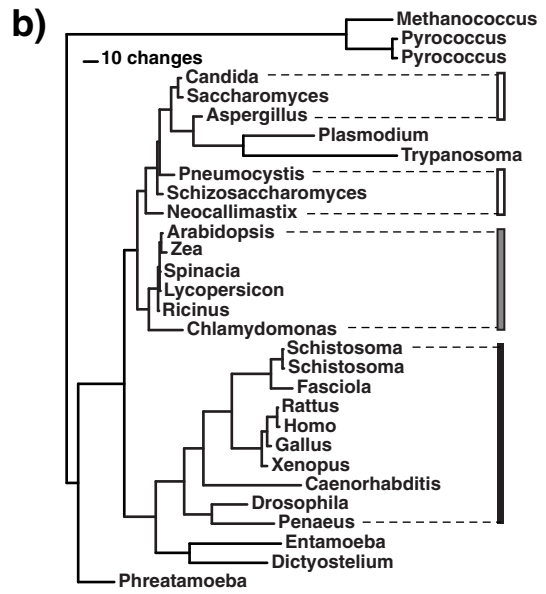

Supplement: pnas_181187698_5.pdf [file pnas_181187698_5.pdf]
